# Supplementary material for: Projected climate change impacts in rainfall erosivity over Brazil
Source: Springer Nature journal article supplement (doi:10.1038/s41598-017-08298-y), 2017-08-08
Supplement: MOESM1 [file 41598_2017_8298_MOESM1_ESM.pdf]

# Projected climate change impacts in rainfall erosivity over Brazil

André Almagro\*, Paulo Tarso S. Oliveira, Mark A. Nearing, Stefan Hagemann

\*Corresponding author: [andre.almagro@gmail.com](mailto:andre.almagro@gmail.com) (+5567981696219)

This file contains:

Supplementary Figure S1

Supplementary Figure S2

Supplementary Figure S3

Supplementary Figure S4

Supplementary Figure S5

Supplementary Figure S6

Supplementary Table S1

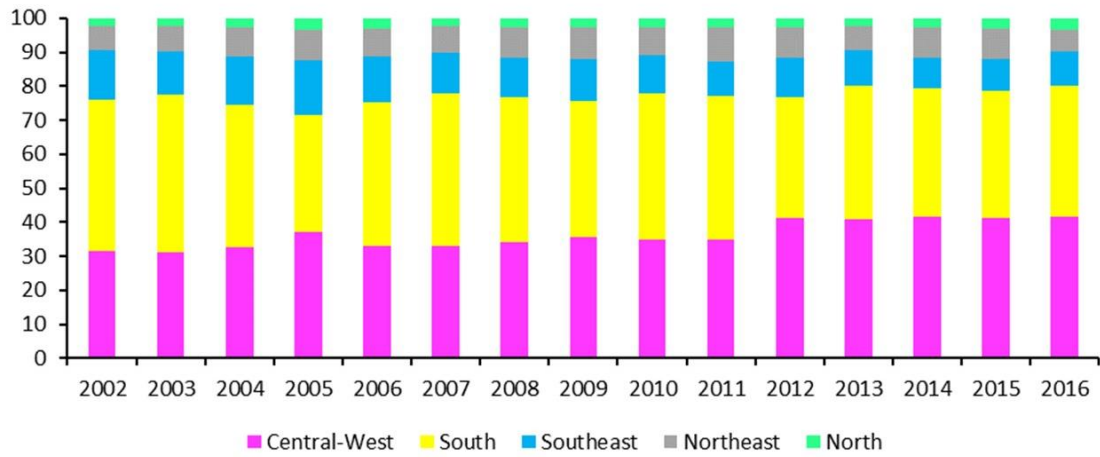

**Supplementary Figure S1.** Percentage (%) of mass of agricultural production for the Brazilian regions between 2002 and 2016 <sup>1</sup>.

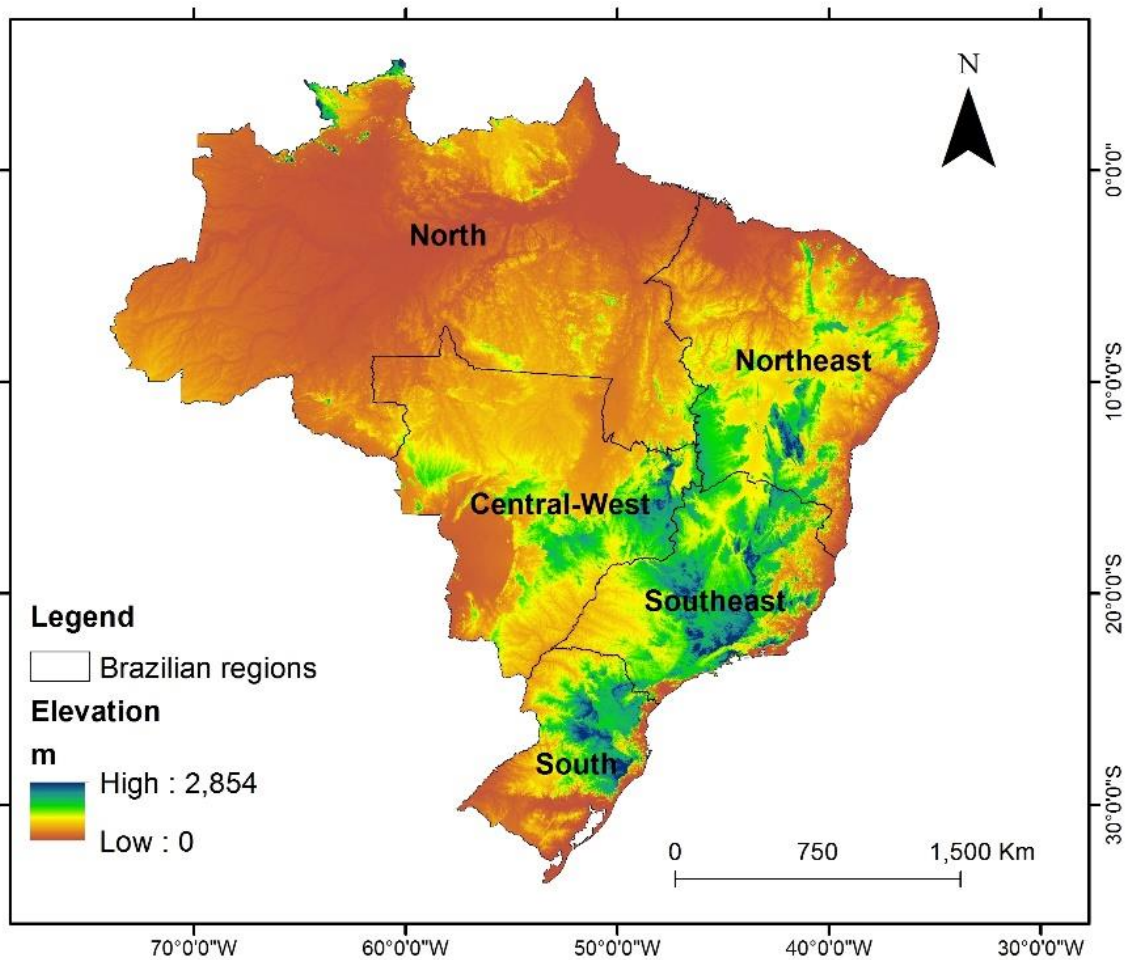

**Supplementary Figure S2.** Elevation map for Brazil. Map created with ESRI ArcGIS 10.1 ([www.esri.com](http://www.esri.com)).

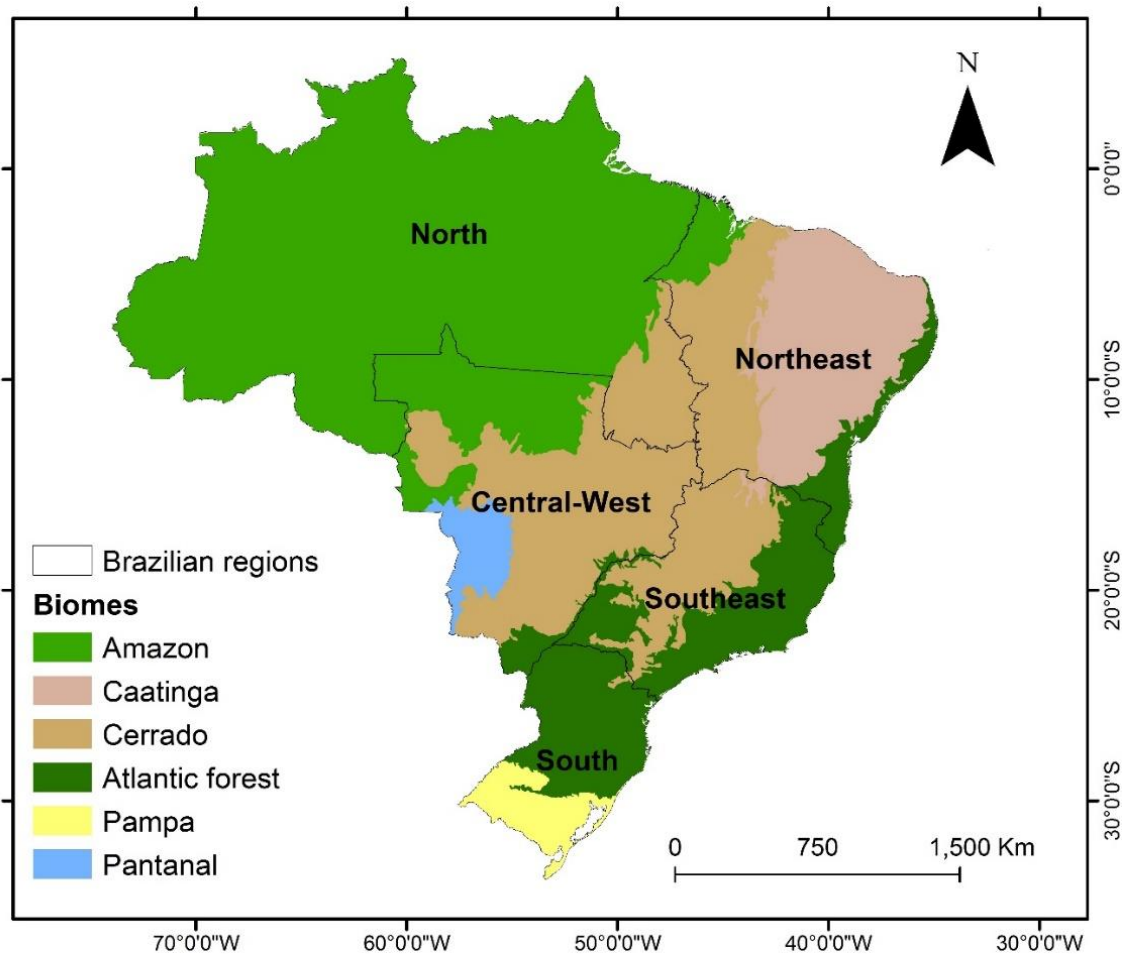

**Supplementary Figure S3.** Biome map for Brazil. Map created with ESRI ArcGIS 10.1 ([www.esri.com](http://www.esri.com)).

### **Brazilian regions**

The five geopolitical regions of Brazil: North (N) has a tropical and wet climate, with the highest amount of annual precipitation of all regions (mean  $\sim 2,200 \text{ mm year}^{-1}$ ) (Fig. S4a and S4d); Northeast (NE) has the lowest values of annual precipitation (mean of  $\sim 900 \text{ mm year}^{-1}$ ) and a semi-arid climate (Fig. S4a and S4e); Central-West (CW) is a subtropical climate region with the major part of the annual rainfall concentrated in spring and summer (Fig. S4a and S4c); Southeast (SE) has a subtropical climate with an annual rainfall distribution similar to the Central-West (Fig. S4g); South (S) exhibits the most homogeneous rainfall distribution over the year, and has the lowest temperatures of all regions (Fig. S4f).

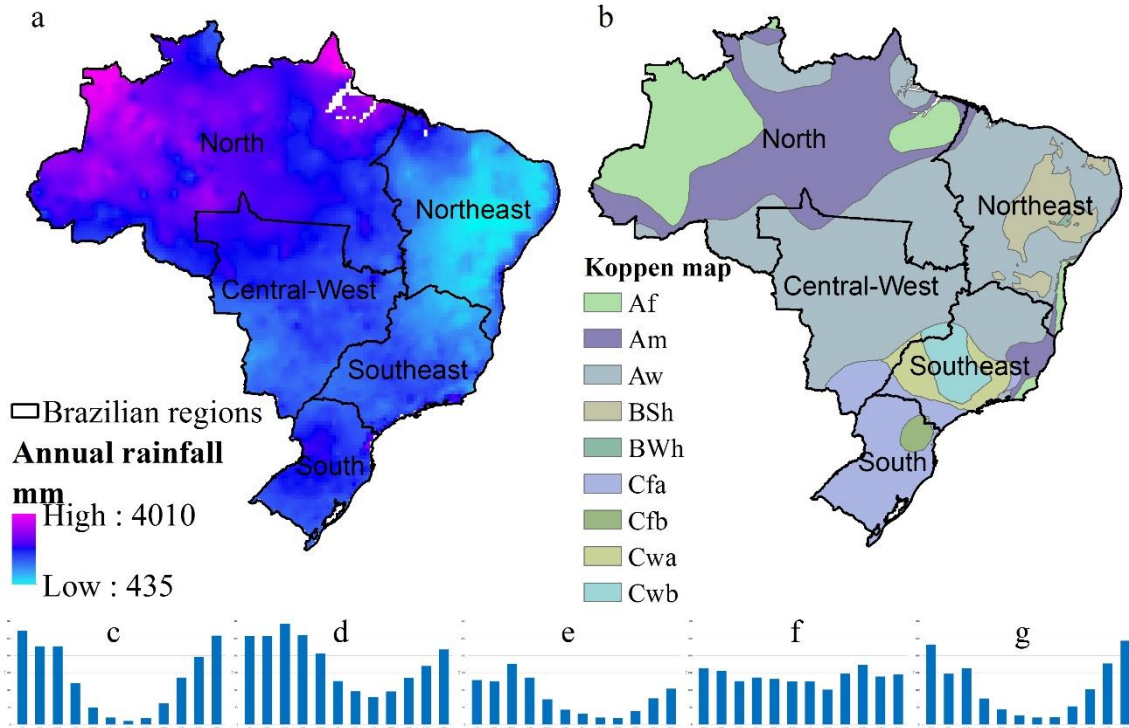

**Supplementary Figure S4. Study area characterization.** a) Mean annual rainfall of Brazil; b) Köppen climate map of Brazil; c) monthly rainfall distribution in Central-West region; d) monthly rainfall distribution in North region; e) monthly rainfall distribution in Northeast region; f) monthly rainfall distribution in South region; g) monthly rainfall distribution in Southeast region. Maps created with ESRI ArcGIS 10.1 ([www.esri.com](http://www.esri.com)).

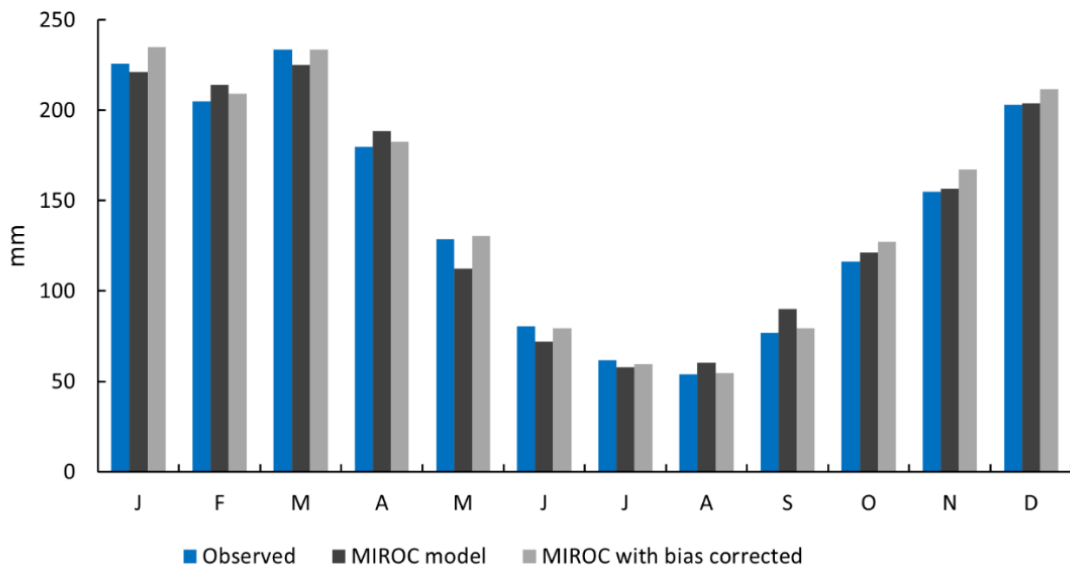

**Supplementary Figure S5.** Monthly rainfall distribution of the overlap period (1980-2005) for observed data (blue), MIROC original data (black), and bias corrected MIROC data (gray) for Brazil.

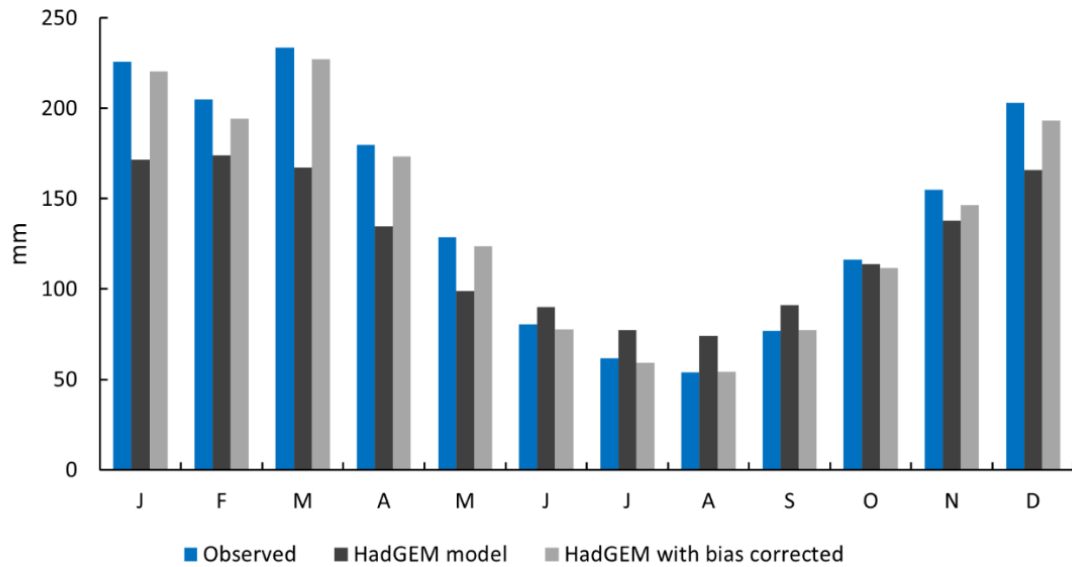

**Supplementary Figure S6.** Monthly rainfall distribution of the overlap period (1980-2005) for observed data (blue), HadGEM original data (black), and bias corrected HadGEM data (gray) for Brazil.

**Supplementary Table S1.** Erosivity estimation equations for Brazil.

| Longitude | Latitude | City-State           | Region | Equation                                     | Author |
|-----------|----------|----------------------|--------|----------------------------------------------|--------|
| -60.00    | -3.00    | Manaus-AM            | N      | $427.7+3.76(\text{MFI})$                     | 2      |
| -40.51    | -9.44    | Juazeiro-BA          | NE     | $69.763+42.307(\text{MFI})$                  | 3      |
| -38.55    | -3.73    | Fortaleza-CE         | NE     | $73.989(\text{MFI})^{0.7387}$                | 4      |
| -40.00    | -19.58   | Aracruz-ES           | SE     | $40.578+7.9075(\text{P})$                    | 5      |
| -49.38    | -16.68   | Goiânia-GO           | CW     | $215.33+30.23(\text{MFI})$                   | 6      |
| -45.00    | -21.25   | Lavras-MG            | SE     | $85.672(\text{MFI})^{0.6557}$                | 7      |
| -44.44    | -21.68   | São Vic. de Minas-MG | SE     | $72.8(\text{MFI})^{0.7783}$                  | 8      |
| -42.15    | -19.80   | Caratinga-MG         | SE     | $321.63(\text{MFI})^{0.48}$                  | 9      |
| -44.25    | -19.42   | Sete Lagoas-MG       | SE     | $25.3+43.35(\text{MFI})-0.232(\text{MFI})^2$ | 10     |
| -42.49    | -19.22   | Belo Oriente-MG      | SE     | $215.4(\text{MFI})^{0.65}$                   | 9      |
| -43.30    | -18.46   | Sto. Ant. Itambé-MG  | SE     | $179.33(\text{MFI})^{0.77}$                  | 9      |
| -43.42    | -19.96   | Santa Bárbara-MG     | SE     | $170.59(\text{MFI})^{0.64}$                  | 9      |
| -42.55    | -19.07   | Açucena-MG           | SE     | $158.35(\text{MFI})^{0.85}$                  | 9      |
| -42.54    | -18.56   | Peçanha-MG           | SE     | $-141.07+9.63(\text{P})$                     | 9      |
| -43.08    | -18.67   | Sabinópolis-MG       | SE     | $123.33(\text{MFI})^{0.74}$                  | 9      |
| -42.85    | -19.64   | Antonio Dias-MG      | SE     | $-119.27+7.84(\text{P})$                     | 9      |
| -42.97    | -18.87   | Sto. D. do Prata-MG  | SE     | $114.42(\text{MFI})^{0.81}$                  | 9      |
| -44.39    | -22.17   | Bocaina de Minas-MG  | SE     | $102.53(\text{MFI})^{0.7586}$                | 8      |
| -54.56    | -22.12   | Dourados-MS          | CW     | $80.305(\text{MFI})^{0.8966}$                | 11     |
| -54.32    | -20.27   | Campo Grande-MS      | CW     | $139.44(\text{MFI})^{0.6784}$                | 11     |
| -54.45    | -18.30   | Coxim-MS             | CW     | $138.33(\text{MFI})^{0.7451}$                | 11     |
| -55.00    | -19.00   | Coxim-MS             | CW     | $231(\text{MFI})^{0.570}$                    | 12     |
| -57.48    | -15.65   | Cáceres-MT           | CW     | $56.115(\text{MFI})^{0.9504}$                | 13     |
| -56.45    | -14.41   | Diamantino-MT        | CW     | $51.46(\text{MFI})^{0.883}$                  | 14     |
| -55.29    | -12.29   | Vera-MT              | CW     | $399.538719(\text{MFI})^{0.458718}$          | 15     |

| Longitude | Latitude | City-State             | Region | Equation                              | Author |
|-----------|----------|------------------------|--------|---------------------------------------|--------|
| -57.27    | -16.03   | Cáceres-MT             | CW     | 36.849(MFI) <sup>1.0852</sup>         | 13     |
| -52.26    | -13.55   | Canarana-MT            | CW     | 317.397829(MFI) <sup>0.484654</sup>   | 15     |
| -54.39    | -15.84   | Poxoréo-MT             | CW     | 272.865645(MFI) <sup>0.419164</sup>   | 15     |
| -57.68    | -16.05   | Cáceres-MT             | CW     | 172.6326451(MFI) <sup>0.5245258</sup> | 16     |
| -56.71    | -13.44   | São J. Rio Claro-MT    | CW     | 147.262400(MFI) <sup>0.533025</sup>   | 15     |
| -54.57    | -16.45   | Rondonópolis-MT        | CW     | 133.2004291(MFI) <sup>0.5372499</sup> | 17     |
| -54.92    | -10.25   | Guarantã do Norte-MT   | CW     | 115.72(MFI) <sup>0.746</sup>          | 14     |
| -56.11    | -15.62   | Cuiabá-MT              | CW     | 109.412(MFI) <sup>0.744</sup>         | 16     |
| -49.37    | -8.23    | Conc. de Araguaia-PA   | N      | 321.5+36.2(MFI)                       | 18     |
| -40.50    | -7.57    | Araripina-PE           | NE     | 73.34+23.18(MFI)                      | 19     |
| -39.24    | -8.28    | Cabrobó-PE             | NE     | 73.34+23.18(MFI)                      | 19     |
| -40.08    | -7.88    | Ouricuri-PE            | NE     | 73.34+23.18(MFI)                      | 19     |
| -40.50    | -9.39    | Petrolina-PE           | NE     | 73.34+23.18(MFI)                      | 19     |
| -37.72    | -8.32    | Poço da Cruz-PE        | NE     | 73.34+23.18(MFI)                      | 19     |
| -35.98    | -8.29    | Caruaru-PE             | NE     | 61.81(MFI) <sup>0.58</sup>            | 19     |
| -36.08    | -8.19    | São Caetano-PE         | NE     | 61.81(MFI) <sup>0.58</sup>            | 19     |
| -36.42    | -8.34    | Belo Jardim-PE         | NE     | 61.81(MFI) <sup>0.58</sup>            | 19     |
| -35.43    | -8.40    | Catende-PE             | NE     | 57.32(MFI) <sup>0.618</sup>           | 19     |
| -35.15    | -7.98    | Olinda-PE              | NE     | 57.25+30.8(MFI)                       | 19     |
| -35.18    | -8.00    | Glória do Goitá-PE     | NE     | 50.75(MFI) <sup>0.724</sup>           | 19     |
| -40.37    | -9.15    | Bebedouro-PE           | NE     | 107.96(MFI) <sup>0.7166</sup>         | 20     |
| -42.80    | -5.09    | Teresina-PI            | NE     | 28.133(MFI)+191.58                    | 21     |
| -41.78    | -2.90    | Parnaíba-PI            | NE     | 27.897(MFI)+316.73                    | 21     |
| -50.26    | -24.41   | Centro-Leste Paraná-PR | S      | 93.29+41.20(MFI)                      | 22     |
| -49.14    | -25.23   | Leste Paraná-PR        | S      | 33.26+40.71(MFI)                      | 22     |
| -51.19    | -22.48   | Norte Paraná-PR        | S      | 216.31+41.30(MFI)                     | 22     |
| -52.03    | -23.45   | Centro Paraná-PR       | S      | 191.79+48.40(MFI)                     | 22     |
| -53.34    | -24.26   | Oeste Paraná-PR        | S      | 182.86+56.21(MFI)                     | 22     |
| -51.27    | -23.22   | Noroeste Paraná-PR     | S      | 164.12+39.44(MFI)                     | 22     |
| -53.03    | -26.07   | Sudoeste Paraná-PR     | S      | 144.86+55.20(MFI)                     | 22     |
| -51.46    | -25.52   | Cento-Sul Paraná-PR    | S      | 107.52+46.89(MFI)                     | 22     |
| -43.88    | -22.70   | Piraí-RJ               | SE     | 95.40+22.69(MFI)                      | 23     |
| -43.28    | -22.96   | Rio de Janeiro-RJ      | SE     | -76.27+53.31(MFI)                     | 23     |
| -44.52    | -23.03   | Angra dos Reis-RJ      | SE     | 73.21+44.61(MFI)                      | 23     |
| -42.32    | -22.17   | Nova Friburgo-RJ       | SE     | 67.991+33.856(MFI)                    | 24     |
| -43.41    | -22.46   | Seropédica-RJ          | SE     | 64.866+38.138(MFI)                    | 24     |
| -42.94    | -22.58   | Magé-RJ                | SE     | 64.59+47.68(MFI)                      | 23     |
| -43.84    | -22.48   | Barra do Piraí-RJ      | SE     | 50.36+24.53(MFI)                      | 23     |
| -42.66    | -22.48   | Conc. de Macabu-RJ     | SE     | 39.86+37.90(MFI)                      | 23     |
| -42.70    | -22.71   | Rio Bonito-RJ          | SE     | 38.48+35.13(MFI)                      | 23     |
| -43.42    | -22.92   | Rio de Janeiro-RJ      | SE     | 3.89+37.76(MFI)                       | 23     |
| -44.58    | -21.84   | Carmo-RJ               | SE     | 223.87+21.00(MFI)                     | 23     |
| -44.06    | -22.23   | Valença-RJ             | SE     | 194.08+27.74(MFI)                     | 23     |
| -43.00    | -22.48   | Magé-RJ                | SE     | 146.28+46.37(MFI)                     | 23     |
| -42.55    | -22.85   | Saquarema-RJ           | SE     | -13.36+50.02(MFI)                     | 23     |

| Longitude | Latitude | City-State         | Region | Equation                                            | Author |
|-----------|----------|--------------------|--------|-----------------------------------------------------|--------|
| -44.12    | -22.75   | Rio Claro-RJ       | SE     | $118.71+38.48(\text{MFI})$                          | 23     |
| -43.56    | -22.07   | Rio das Flores-RJ  | SE     | $112.54+20.70(\text{MFI})$                          | 23     |
| -56.00    | -28.65   | São Borja-RS       | S      | $55.564(\text{MFI})^{1.1054}$                       | 25     |
| -56.43    | -30.38   | Quaraí-RS          | S      | $-47.35+82.72(\text{MFI})$                          | 26     |
| -57.08    | -29.75   | Uruguaiana-RS      | S      | $-252.559+117.069(\text{MFI}) -1.657(\text{MFI})^2$ | 27     |
| -54.48    | -27.85   | Santa Rosa-RS      | S      | $118.52(\text{MFI})^{0.8034}$                       | 28     |
| -53.90    | -28.55   | Ijuí-RS            | S      | $109.65(\text{MFI})^{0.76}$                         | 29     |
| -51.20    | -27.40   | Campos Novos-SC    | S      | $59.265(\text{MFI})^{1.087}$                        | 30     |
| -49.23    | -23.22   | Piraju-SP          | SE     | $72.5488(\text{MFI})^{0.8488}$                      | 31     |
| -47.04    | -22.52   | Campinas-SP        | SE     | $68.730(\text{MFI})^{0.841}$                        | 32     |
| -47.95    | -24.28   | Sete Barras-SP     | SE     | $316.20+55.40(\text{MFI})$                          | 33     |
| -47.75    | -24.40   | Juquiá-SP          | SE     | $207.21+40.65(\text{MFI})$                          | 33     |
| -47.01    | -21.28   | Mococa-SP          | SE     | $111.173(\text{MFI})^{0.691}$                       | 34     |
| -52.17    | -22.62   | Teodoro Sampaio-SP | SE     | $106.8183+46.9562(\text{MFI})$                      | 35     |

## REFERENCES

1. IBGE. Levantamento Sistemático Da Produção Agrícola. *Novembro 2016* **29**, 1–85 (2016).
2. Oliveira Jr., R. C. & Medina, B. F. A erosividade das chuvas em Manaus (AM). *Rev. Bras. Ciência do Solo* **14**, 235–239 (1990).
3. Silva, A. M. Rainfall erosivity map for Brazil. *Catena* **57**, 251–259 (2004).
4. Dias, A. S. & Silva, J. R. C. A erosividade das chuvas em Fortaleza (CE). I - Distribuição, probabilidade de ocorrência e período de retorno - 1ª Aproximação. *Rev. Bras. Ciências do Solo* **27**, 335–345 (2003).
5. Martins, S. G., Avanzi, J. C. & Naves, M. L. Rainfall erosivity and rainfall return period in the experimental watershed of Aracruz, in the coastal plain of Espírito Santo, Brazil. *Rev. Bras. Ciência do Solo* **34**, 999–1004 (2010).
6. Silva, M. L. N., De Freitas, P. L., Blancaneaux, P. & Curi, N. Índices de erosividade das chuvas da região de Goiânia, GO. *Pesqui. Agropecu. Bras.* **32**, 977–985 (1997).
7. Aquino, R. F. *et al.* Erosividade das chuvas e tempo de recorrência para lavras, Minas Gerais. *Rev. Ceres* **61**, 9–16 (2014).

8. Mello, C. R., Norton, L. D., Curi, N. & Yanagi, S. N. M. Sea Surface Temperature (SST) and rainfall erosivity in the Upper Grand River Basin, Southeast Brazil. *Cienc. e Agrotecnologia* **36**, 53–59 (2012).
9. Silva, R. B., Iori, P., Armesto, C. & Bendini, H. N. Assessing Rainfall Erosivity with Artificial Neural Networks for the Ribeira Valley, Brazil. *Int. J. Agron.* **2010**, 1–7 (2010).
10. Marques, J. J. G. S. M., Alvarenga, R. C., Curi, N. & Santana, D. P. Índices de erosividade da chuva, perdas de solo e fator erodibilidade para dois solos da região dos Cerrados - primeira aproximação. *Rev. Bras. Ciência do Solo* **21**, 427–434 (1997).
11. Oliveira, P. T. S. de, Rodrigues, D. B. B., Alves Sobrinho, T., de Carvalho, D. F. & Panachuki, E. Spatial variability of the rainfall erosive potential in the state of Mato Grosso do Sul, Brazil. *Eng. Agríc. Jaboticabal* **32**, 69–79 (2012).
12. Machado, D. O., Alves Sobrinho, T., Ribeiro, A. D. S., Ide, C. N. & Oliveira, P. T. S. Rainfall erosivity for Pantanal biome. *Eng. Sanit. e Ambient.* **19**, 195–201 (2014).
13. Morais, L. F. . *et al.* Índice EI30 e sua Relação com o Coeficiente de Chuva do Sudoeste do Mato Grosso. *Rev. Bras. Ciências do Solo* **15**, 339–344 (1991).
14. Almeida, C. O. S. Erosividade das chuvas no estado de Mato Grosso. *Master's thesis* (2009).
15. Almeida, C. O. S., Amorim, R. S. S., Eltz, F. L. F., Couto, E. G. & Jordani, S. a. Erosividade da chuva em municípios do Mato Grosso: Distribuição sazonal e correlações com dados pluviométricos. *R. Bras. Eng. Agríc. Ambient.* **16**, 142–152 (2012).
16. Almeida, C. O. S., Amorim, R. S. S., Couto, E. G., Eltz, F. L. F. & Borges, L. E. C. Potencial erosivo da chuva de Cuiabá, MT: distribuição e correlação com a precipitação pluviométrica. *Rev. Bras. Eng. Agrícola e Ambient.* **15**, 178–184 (2011).
17. Almeida, C. O. S., Amorim, R. S. S., Eltz, F. L. F., Couto, E. G. & Pelissari, A. L. Correlação do índice de erosividade (EI30) com o coeficiente de chuvas em Cáceres (MT) e Rondonópolis (MT). *Proc. XXXIII Congr. Bras. Ciência do Solo* 1–4 (2011). doi:10.1017/CBO9781107415324.004
18. Oliveira Jr., R. C. Índice de Erosividade das Chuvas na Região de Conceição do Araguaia, Pará. *EMBRAPA-CPATU* **165**, 20 (1996).
19. Cantalice, J. R. B., Bezerra, S. A., Figueira, S. B., Inácio, E. D. S. B. & Silva, M. D. R. D. O. Linhas Isoerosivas Do Estado De Pernambuco - 1ª Aproximação. *Rev. Caatinga* **22**, 75–80 (2009).



20. Silva, M. T., Silva, V. P. R., Souza, E. P., Araújo, A. L. & Azevedo, J. V. V. in *Recur. Nat. do Semiárido – Estud. Apl.* 325–339 (2016). doi:10.13140/RG.2.1.3516.3766
21. Santos Júnior, A. B. Erosividade e padrão de chuvas em Teresina e Parnaíba no Piauí. (2011).
22. Rufino, R. L., Biscaia, R. C. M. & Merten, G. H. Determinação do potencial erosivo da chuva do Estado do Paraná através da pluviometria: terceira aproximação. *Rev. Bras. Ciência do Solo* **17**, 439–444 (1993).
23. Gonçalves, F. a., Silva, D. D. Da, Pruski, F. F., Carvalho, D. F. De & Cruz, E. S. Da. Índices e espacialização da erosividade das chuvas para o Estado do Rio de Janeiro. *Rev. Bras. Eng. Agrícola e Ambient.* **10**, 269–276 (2006).
24. Carvalho, D. F. De, Montebeller, C. a., Bertol, I., Valcarcel, R. & Franco, E. M. Rainfall patterns and erosion indices at Seropedica and Nova Friburgo, Rio de Janeiro - Brazil. *Rev. Bras. Eng. Agrícola e Ambient.* **9**, 7–14 (2005).
25. Cassol, E. A. *et al.* Erosividade, padrões hidrológicos, período de retorno e probabilidade de ocorrência das chuvas em São Borja, RS. *Rev. Bras. Cienc. do Solo* **32**, 1239–1251 (2008).
26. Bazzano, M. G. P., Eltz, F. L. F. & Cassol, E. A. Erosividade, coeficiente de chuva, padrões e período de retorno das Chuvas de Quaraí, RS. *Rev. Bras. Cienc. do Solo* **31**, 1205–1217 (2007).
27. Hickmann, C., Eltz, F. L. F., Cassol, E. A. & Cogo, C. M. Erosividade das chuvas em Uruguaiana, RS, determinada pelo índice EI30, com base no período de 1963 a 1991. *Rev. Bras. Ciência do Solo* **32**, 825–831 (2008).
28. Mazurana, J., Cassol, E. A., Santos, L. C., Eltz, F. L. F. & Bueno, A. C. Erosividade, padrões hidrológicos e período de retorno das chuvas erosivas de Santa Rosa (RS). *Rev. Bras. Eng. Agrícola e Ambient.* **13**, 975–983 (2009).
29. Cassol, E. A., Martins, D., Luiz, F., Eltz, F. & Lima, V. S. De. Erosivity and hydrological patterns of Ijuí (RS, Brazil) rainfalls in the period of 1963 to 1993. *Rev. Bras. Agrometeorol.* **15**, 220–231 (2007).
30. Bertol, I. Evaluation for rain erosivity for Campos Novos (SC) during the 1981-1990 period. *Pesqui. Agropecuária Bras.* **29**, 1453–1458 (1994).
31. Roque, C. G., Carvalho, M. P. & Prado, R. M. Fator erosividade da chuva de Piraju (SP): distribuição, probabilidade de ocorrência, período de retorno e correlação com o coeficiente de chuva. *Rev. Bras. Ciência do Solo* **25**, 147–156 (2001).
32. Lombardi Neto, F. & Moldenhauer, W. C. Erosividade da chuva: sua distribuição e relação com as perdas de solo em Campinas (SP). *Bragantia* **51**, 189–196 (1992).

33. Silva, R. B., Iori, P. & Silva, F. A. D. M. Proposition and compare of equations to estimate the rainfall erosivity in two cities of São Paulo state. *Irriga* **14**, 533–547 (2009).
34. Carvalho, M. P. E., Lombardi Neto, F., Vasques Filho, J. & Catâneo, A. Correlação entre o índice de erosividade EI30 médio mensal e o coeficiente de chuva do município de Mococa, SP. *Científica - Rev. Agron.* **19**, 1–7 (1991).
35. Colodro, G., Carvalho, M. P., Roque, C. G. & Prado, R. M. Rainfall erosivity: its distribution and relationship with the nonrecording rain gauge precipitation at Teodoro Sampaio, São Paulo, Brazil. *Rev. Bras. Ciência do Solo* **26**, 809–818 (2002).
